# Supplementary material for: Computational design of donor-bridge-acceptor systems exhibiting pronounced quantum interference effects
Source: Royal Society of Chemistry journal article supplement (doi:10.1039/c5cp06728f), 2016-01-01
Supplement: c5cp06728f1.pdf [file c5cp06728f1.pdf]

Electronic Supplementary Information  
Computational design of donor-bridge-acceptor  
systems exhibiting pronounced quantum  
interference effects

Natalie Gorczak<sup>1</sup>, Nicolas Renaud<sup>1</sup>, Elena Galan<sup>1,2</sup>, Rienk  
Eelkema<sup>1</sup>, Laurens D. A. Siebbeles<sup>1</sup>, and Ferdinand C. Grozema<sup>1</sup>

<sup>1</sup>*Department of Chemical Engineering, Delft University of Technology, Delft*

<sup>2</sup>*Present address: Novaled GmbH, Dresden, Germany*

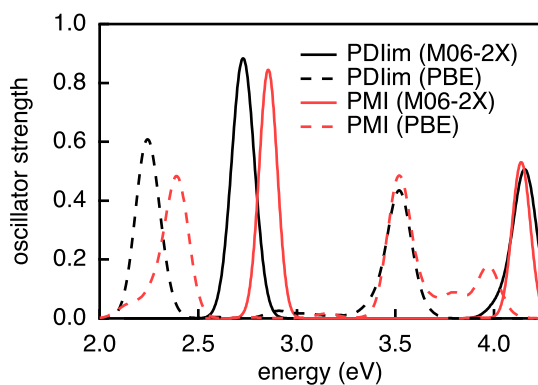

Figure 1: Comparison of optical excitation spectra of **PDIim** and **PMI** using TD-DFT with DZP basis set and M06-2X functional (solid) and PBE functional (dashed).

Table 1: Contribution of the HOFO of the hole donor to the initial state with the direct coupling  $V_{DB_{\text{HOFO}}}$  between donor and bridge

|                       | $V_{DB_{\text{HOFO}}}$ | HOFO contribution |
|-----------------------|------------------------|-------------------|
| <b>PDlim</b> (M06-2X) | 0.00 eV                | 100 %             |
| <b>PDlim</b> (PBE)    | 0.00 eV                | 83 %              |
| <b>PMI</b> (M06-2X)   | -0.11 eV               | 94 %              |
| <b>PMI</b> (PBE)      | 0.08 eV                | 67 %              |

Table 2: Contribution of the HOFO of the hole acceptor to the final state with the effective electronic couplings for hole transfer  $J_{\text{eff}}$ . Note, that a coupling of 1 meV is regarded as the limit of accuracy that can be obtained with DFT.

|                               | HOFO contribution | $J_{\text{eff}}$ |
|-------------------------------|-------------------|------------------|
| <b>SNS</b> (M06-2X)           | 98 %              | 0.1 meV          |
| <b>SNS</b> (PBE)              | 98 %              | -1.6 meV         |
| <b>lin_carbeth</b> (M06-2X)   | 83 %              | 39 meV           |
| <b>lin_carbeth</b> (PBE)      | 82 %              | 65 meV           |
| <b>cross_carbeth</b> (M06-2X) | 88 %              | -3.8 meV         |
| <b>cross_carbeth</b> (PBE)    | 86 %              | 2.8 meV          |
